# Supplementary material for: BAR-Seq clonal tracking of gene-edited cells
Source: Springer Nature journal article supplement (doi:10.1038/s41596-021-00529-x), 2021-05-24
Supplement: MOESM3 [file 41596_2021_529_MOESM3_ESM16.xlsx]

## Sheet: Supp. Table 1
Supplementary Table 1. Probability of collisions (i.e. independent clones sharing the same BAR) at the given ratios between the number of library barcodes and number of cells analyzed
no. BARs / no. cells	p of collisions
1	0.632121
2	0.393469
5	0.181269
10	0.0951626
20	0.0487706
50	0.0198013
100	0.00995017
200	0.00498752
500	0.001998
1000	0.0009995
2000	0.000499875
5000	0.00019998
10000	9.9995e-05
20000	4.99988e-05
50000	1.99998e-05
100000	9.99995e-06
200000	4.99999e-06
500000	2e-06
1000000	1e-06

## Sheet: Supp. Table 2
Supplementary Table 2. Probability of collisions and number of edited cells needed to generate collisions at the given edit distances.
Barcode length	Mean distance	Variance	Median	Mode	Gumbel mu	Gumbel beta	Library Complexity	p(Collision|d=1)	# cells d1	p(Collision|d=2)	# cells d2	p(Collision|d=3)	# cells d3
5	3.51693	0.822759	4	4	3.95739	0.81378	1024	0.026061	86	0.086286	70	0.265353	52
6	4.14987	0.954766	4	4	4.62692	0.896816	4096	0.017371	182	0.052039	155	0.150395	124
7	4.76689	1.07723	5	5	5.27539	0.96699	16384	0.011946	380	0.033238	333	0.090698	280
8	5.37502	1.19433	5	5	5.91177	1.0291	65536	0.00842	791	0.022097	706	0.057337	612
9	5.97292	1.30328	6	6	6.53462	1.08339	262144	0.006026	1637	0.015098	1482	0.037567	1311
10	6.57089	1.41707	7	7	7.15737	1.13591	1048576	0.004414	3372	0.010613	3087	0.025405	2775
11	7.15413	1.515	7	7	7.76094	1.1789	4194304	0.003226	6936	0.007518	6405	0.01747	5826
12	7.74385	1.62421	8	8	8.37284	1.22517	16777216	0.002432	14211	0.005493	13214	0.012381	12139
13	8.3122	1.71249	8	8	8.95832	1.26077	67108864	0.001812	29109	0.004001	27222	0.008823	25197
14	8.9169	1.83255	9	9	9.58581	1.30801	268435456	0.001409	59367	0.003025	55805	0.006485	52008
15	9.48164	1.92369	10	10	10.1674	1.34402	1073741824	0.00109	121033	0.002293	114246	0.004819	107038
16	10.0471	2.00668	10	10	10.7475	1.37379	4294967296	0.000829	246876	0.001715	233888	0.003548	220134
17	10.6238	2.10302	11	11	11.3411	1.40783	17179869184	0.000645	502409	0.001313	477485	0.002669	451240
18	11.1938	2.18974	11	11	11.9256	1.43607	68719476736	0.000496	1022626	0.000996	974651	0.001997	924302
19	11.7531	2.27848	12	12	12.5001	1.46866	274877906944	0.000397	2074958	0.000785	1982588	0.00155	1885907
20	12.3237	2.36943	12	12	13.0854	1.49664	1099511627776	0.000311	4214106	0.000607	4035854	0.001184	3849532
21	12.8773	2.44781	13	13	13.6516	1.52294	4398046511104	0.000247	8547597	0.000476	8203104	0.000917	7843686
22	13.4526	2.54179	13	14	14.2417	1.55248	17592186044416	0.000198	17321250	0.000376	16657166	0.000716	15962432
23	14.0173	2.62848	14	14	14.82	1.57974	70368744177664	0.000159	35085259	0.000299	33794883	0.000563	32450429
24	14.5627	2.69691	15	15	15.3756	1.60085	281474976710656	0.000126	71097512	0.000235	68585476	0.000439	65970996
25	15.1236	2.77939	15	15	15.9488	1.62265	1125899906842624	0.0001	144013342	0.000185	139120695	0.000342	134055728
26	15.6769	2.85989	16	16	16.5141	1.64842	4503599627370496	8.2e-05	291113136	0.00015	281615457	0.000275	271749296
27	16.2365	2.94337	16	16	17.0862	1.67558	1.80144e+16	6.8e-05	587990169	0.000123	569542809	0.000223	550401972
28	16.7848	3.02262	17	17	17.646	1.69819	7.20576e+16	5.5e-05	1188910142	0.0001	1152106737	0.00018	1114738063
29	17.3555	3.10716	17	17	18.2286	1.72234	2.8823e+17	4.5e-05	2402021666	8.1e-05	2330423168	0.000145	2257256727
30	17.8874	3.17183	18	18	18.7696	1.73927	1.15292e+18	3.7e-05	4850792575	6.5e-05	4714967310	0.000115	4573328094
31	18.4546	3.25553	18	19	19.3484	1.76281	4.61169e+18	3e-05	9800769609	5.3e-05	9529224225	9.4e-05	9247761659
32	19.0042	3.3239	19	19	19.907	1.77978	1.84467e+19	2.4e-05	19810423612	4.3e-05	19259765915	7.5e-05	18719379756

## Sheet: Supp. Table 3
Supplementary Table 3. List of the BAR-Seq primers. Bold underlined sequences indicate restriction sites; bold italic sequence indicates the BAR consensus; bold sequences indicate Illumina tags.
Primer name	Use	Step	P7/P5	Illumina index (i7/i5)	Full sequence
BAR ssODN	BAR ssODN template	1	-	-	Custom; example: AGACTAGGAAGGAGGAGGCCTAAGGATGGGGCTTTTCTGTCACCAATCCTGTCCCTANNYNNNTNTNNNNRTNDNNNHHCCATAGAGCCCACCGCATCCCCAGCATGCCTGCTATTGT
Library generation Fw	Barcoded ssODN amplification	1	-	-	Custom; example: AGACTAGGAAGGAGGAGGCCTAAGGATG
Library generation Rv	Barcoded ssODN amplification	1	-	-	Custom; example: ACAATAGCAGGCATGCTGGGGATG
Vector_PCR1_Fw	BAR-Seq plasmid/viral library sequencing	Box 1 and 2			Custom
Vector_PCR1_Rv	BAR-Seq plasmid/viral library sequencing	Box 1 and 2			Custom
Vector_PCR2_Fw	BAR-Seq plasmid/viral library sequencing	Box 1 and 2	P7	N701	CAAGCAGAAGACGGCATACGAGATTCGCCTTAGTCTCGTGGGCTCGGAGATGTGTATAAGAGACAG-[Vector_PCR1_Fw]
Vector_PCR2_Rv	BAR-Seq plasmid/viral library sequencing	Box 1 and 2	P5	N501	AATGATACGGCGACCACCGAGATCTACACTAGATCGCTCGTCGGCAGCGTCAGATGTGTATAAGAGACAG-[Vector_PCR1_Rv]
PCR1_Fw	BAR-Seq amplicon preparation (first PCR)	104	-	-	Custom (can be the same of "BAR vector Fw")
PCR1_Rv	BAR-Seq amplicon preparation (first PCR)	104	-	-	Custom
PCR2_Fw1	BAR-Seq amplicon preparation (second PCR)	105	P7	N701	CAAGCAGAAGACGGCATACGAGATTCGCCTTAGTCTCGTGGGCTCGGAGATGTGTATAAGAGACAG-[PCR1_Fw]
PCR2_Fw2	BAR-Seq amplicon preparation (second PCR)	105	P7	N702	CAAGCAGAAGACGGCATACGAGATCTAGTACGGTCTCGTGGGCTCGGAGATGTGTATAAGAGACAG-[PCR1_Fw]
PCR2_Fw3	BAR-Seq amplicon preparation (second PCR)	105	P7	N703	CAAGCAGAAGACGGCATACGAGATTTCTGCCTGTCTCGTGGGCTCGGAGATGTGTATAAGAGACAG-[PCR1_Fw]
PCR2_Fw4	BAR-Seq amplicon preparation (second PCR)	105	P7	N704	CAAGCAGAAGACGGCATACGAGATGCTCAGGAGTCTCGTGGGCTCGGAGATGTGTATAAGAGACAG-[PCR1_Fw]
PCR2_Fw5	BAR-Seq amplicon preparation (second PCR)	105	P7	N705	CAAGCAGAAGACGGCATACGAGATAGGAGTCCGTCTCGTGGGCTCGGAGATGTGTATAAGAGACAG-[PCR1_Fw]
PCR2_Fw6	BAR-Seq amplicon preparation (second PCR)	105	P7	N706	CAAGCAGAAGACGGCATACGAGATCATGCCTAGTCTCGTGGGCTCGGAGATGTGTATAAGAGACAG-[PCR1_Fw]
PCR2_Fw7	BAR-Seq amplicon preparation (second PCR)	105	P7	N707	CAAGCAGAAGACGGCATACGAGATGTAGAGAGGTCTCGTGGGCTCGGAGATGTGTATAAGAGACAG-[PCR1_Fw]
PCR2_Rv1	BAR-Seq amplicon preparation (second PCR)	105	P5	N501	AATGATACGGCGACCACCGAGATCTACACTAGATCGCTCGTCGGCAGCGTCAGATGTGTATAAGAGACAG-[PCR1_Rv]
PCR2_Rv2	BAR-Seq amplicon preparation (second PCR)	105	P5	N502	AATGATACGGCGACCACCGAGATCTACACCTCTCTATTCGTCGGCAGCGTCAGATGTGTATAAGAGACAG-[PCR1_Rv]
PCR2_Rv3	BAR-Seq amplicon preparation (second PCR)	105	P5	N505	AATGATACGGCGACCACCGAGATCTACACGTAAGGAGTCGTCGGCAGCGTCAGATGTGTATAAGAGACAG-[PCR1_Rv]
PCR2_Rv4	BAR-Seq amplicon preparation (second PCR)	105	P5	N506	AATGATACGGCGACCACCGAGATCTACACACTGCATATCGTCGGCAGCGTCAGATGTGTATAAGAGACAG-[PCR1_Rv]
PCR2_Rv5	BAR-Seq amplicon preparation (second PCR)	105	P5	N507	AATGATACGGCGACCACCGAGATCTACACAAGGAGTATCGTCGGCAGCGTCAGATGTGTATAAGAGACAG-[PCR1_Rv]
PCR2_Rv6	BAR-Seq amplicon preparation (second PCR)	105	P5	N513	AATGATACGGCGACCACCGAGATCTACACTCGACTAGTCGTCGGCAGCGTCAGATGTGTATAAGAGACAG-[PCR1_Rv]
PCR2_Rv7	BAR-Seq amplicon preparation (second PCR)	105	P5	N516	AATGATACGGCGACCACCGAGATCTACACCCTAGAGTTCGTCGGCAGCGTCAGATGTGTATAAGAGACAG-[PCR1_Rv]
